# Supplementary material for: Effect of an infant formula containing sn-2 palmitate on fecal microbiota and metabolome profiles of healthy term infants: a randomized, double-blind, parallel, controlled study
Source: Royal Society of Chemistry journal article supplement (doi:10.1039/d1fo03692k), 2022-01-01
Supplement: d1fo03692k1.pdf [file d1fo03692k1.pdf]

## Supplementary material

**Fig.S1**

**A**

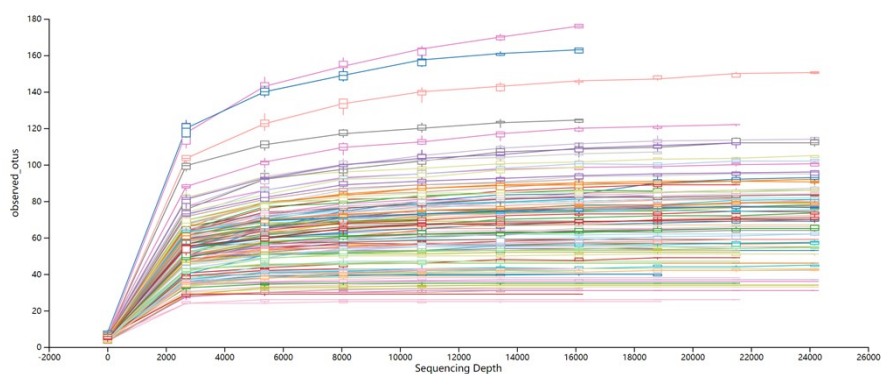

**B**

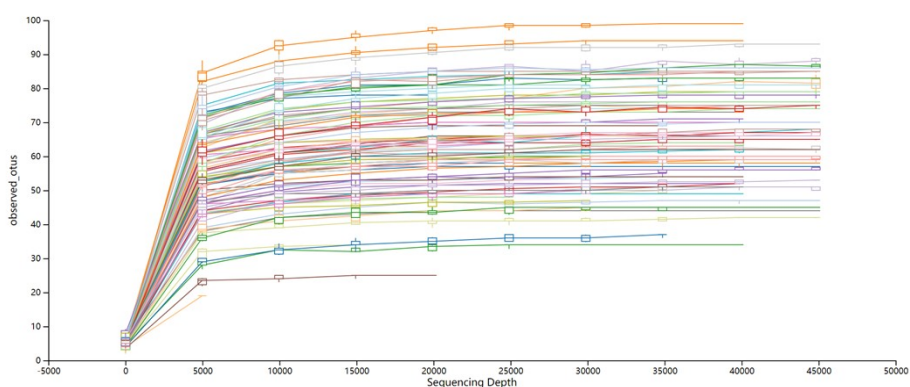

**Fig.S1.** (A) The rarefaction curves of sequencing samples at 8 weeks. (B) The rarefaction curves of sequencing samples at 16 weeks.

**Fig.S2**

**A**

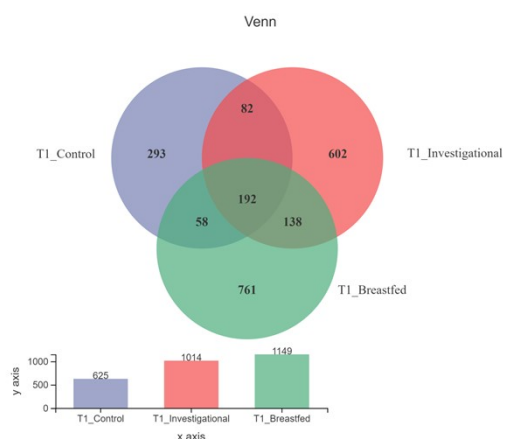

**B**

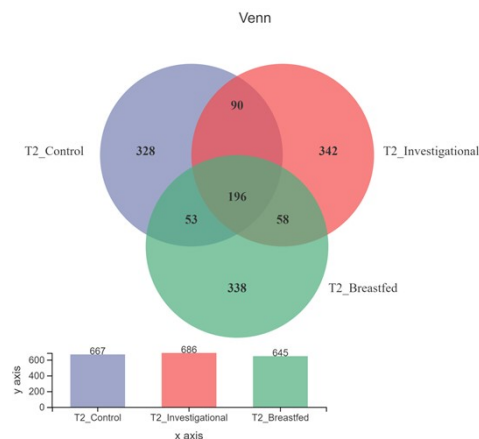

**Fig.S2.** (A) The Venn diagram of OTU numbers at 8 weeks. (B) The Venn diagram of OTU numbers at 16 weeks.

Fig.S3

A

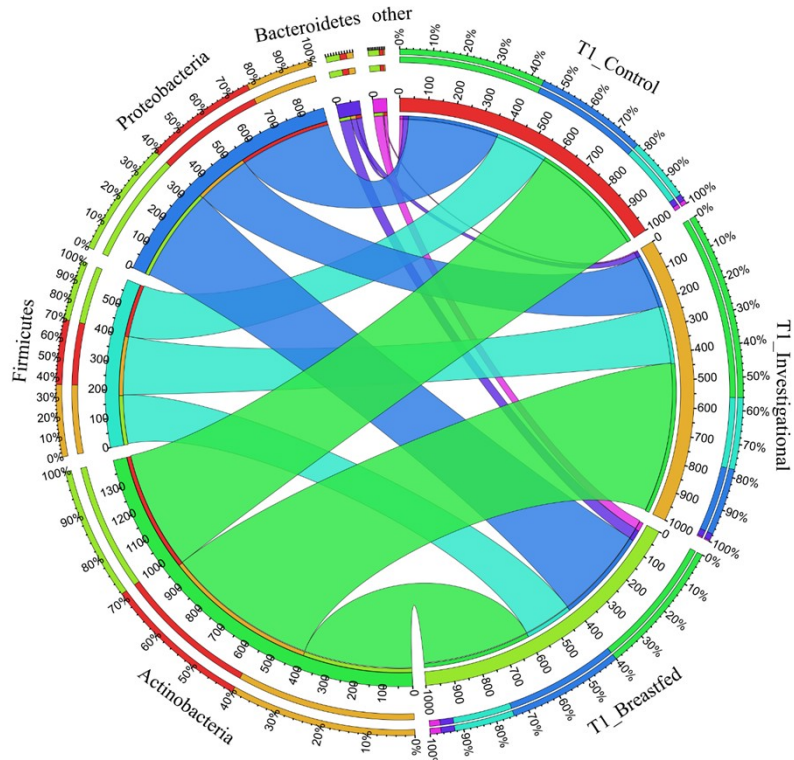

B

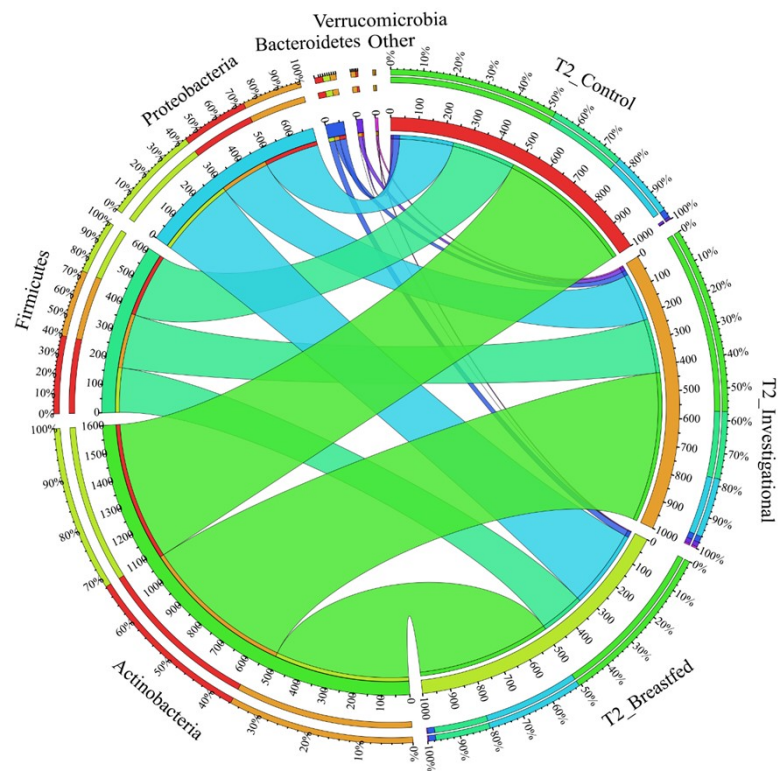

Fig.S3. (A) A circos plot of gut microbiota structure at the phylum level at 8 weeks; (B) A circos plot of gut microbiota structure at the phylum level at 16 weeks.

**Fig.S4**

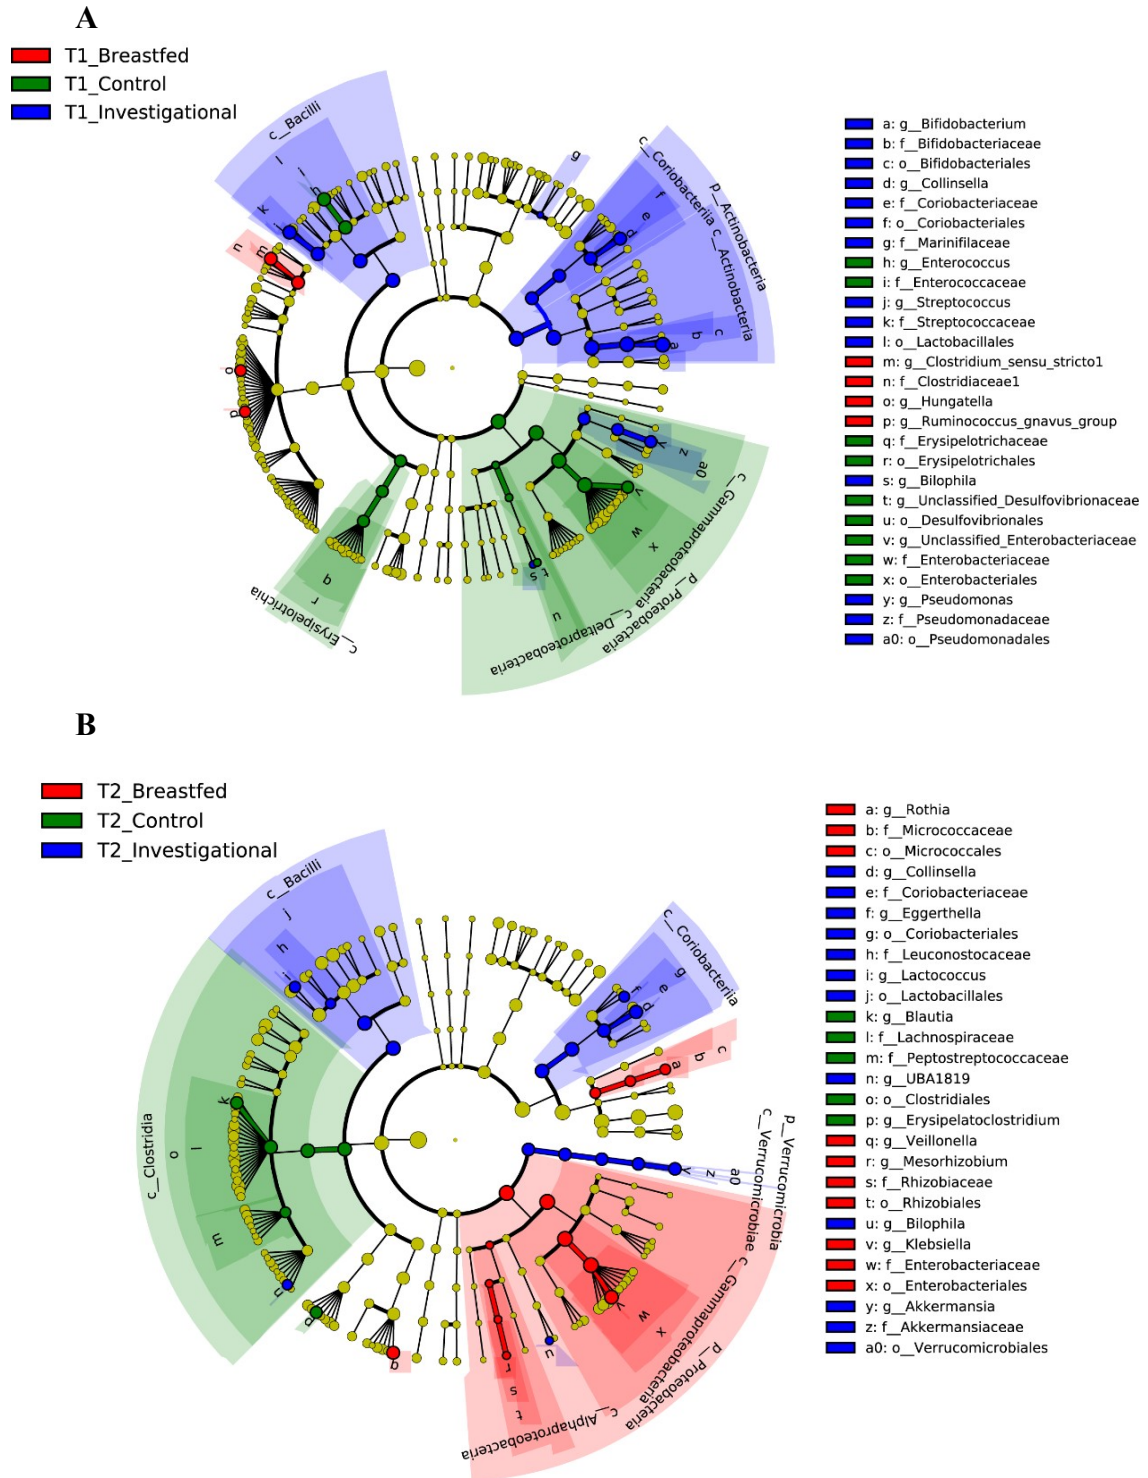

**Fig.S4.** (A) LEfSe analysis at the genus level at 8 weeks, LDA = 3.0,  $\alpha = 0.05$ ; (B) LEfSe analysis at the genus level at 16 weeks, LDA = 2.0,  $\alpha = 0.05$ .

Fig.S5

A

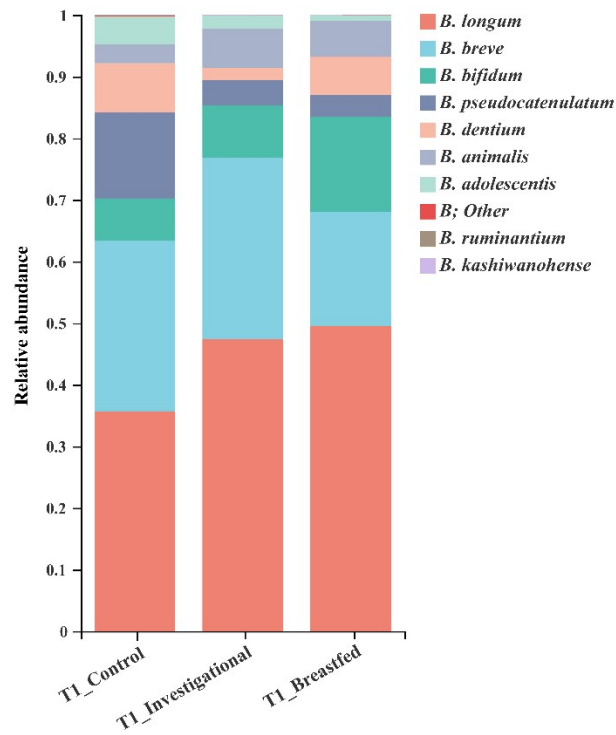

B

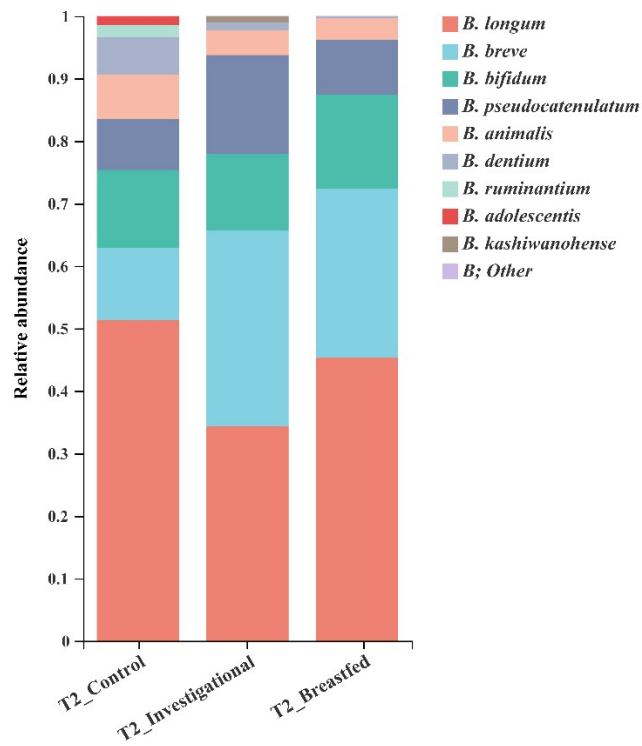

Fig.S5. (A) The species composition of Bifidobacterium in infant feces at 8 weeks; (B) The species composition of Bifidobacterium in infant feces at 16 weeks.

Fig.S6

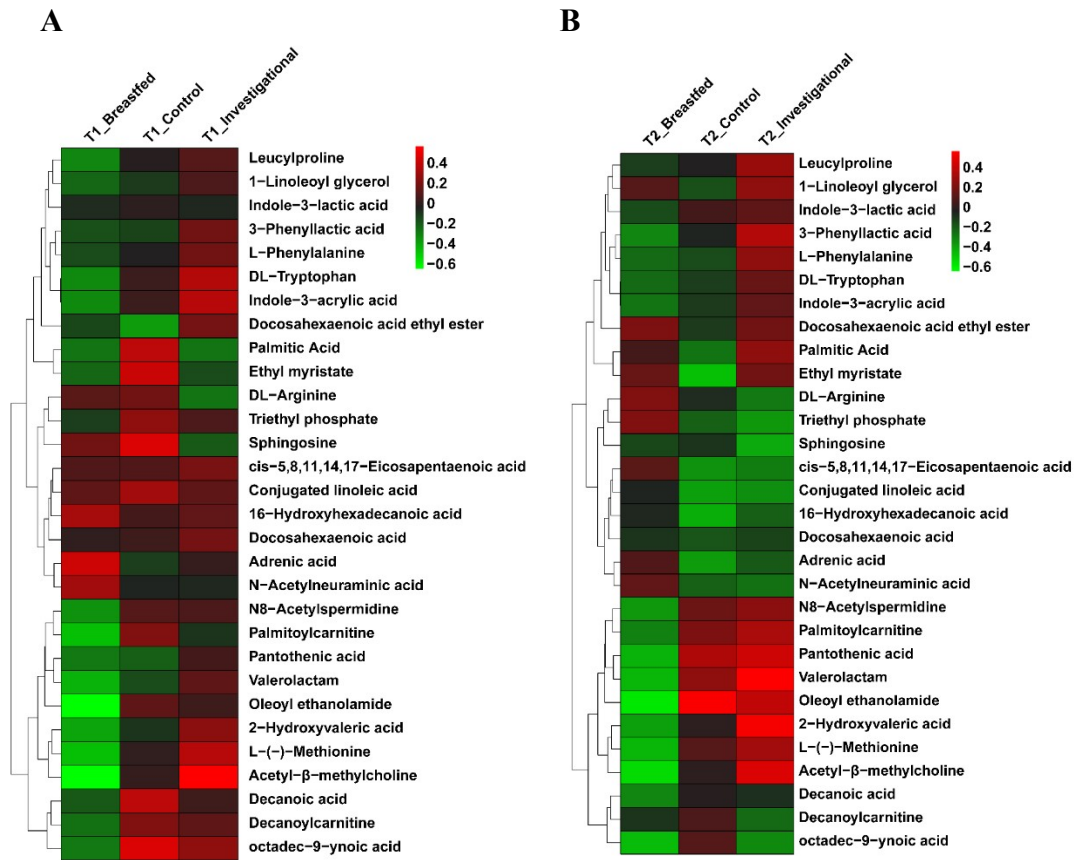

**Fig.S6.** (A) Clustering heatmap of the top 30 most abundant metabolites and three groups at 8 weeks; (B) Clustering heatmap of the top 30 most abundant metabolites and three groups at 16 weeks.



Fig.S7

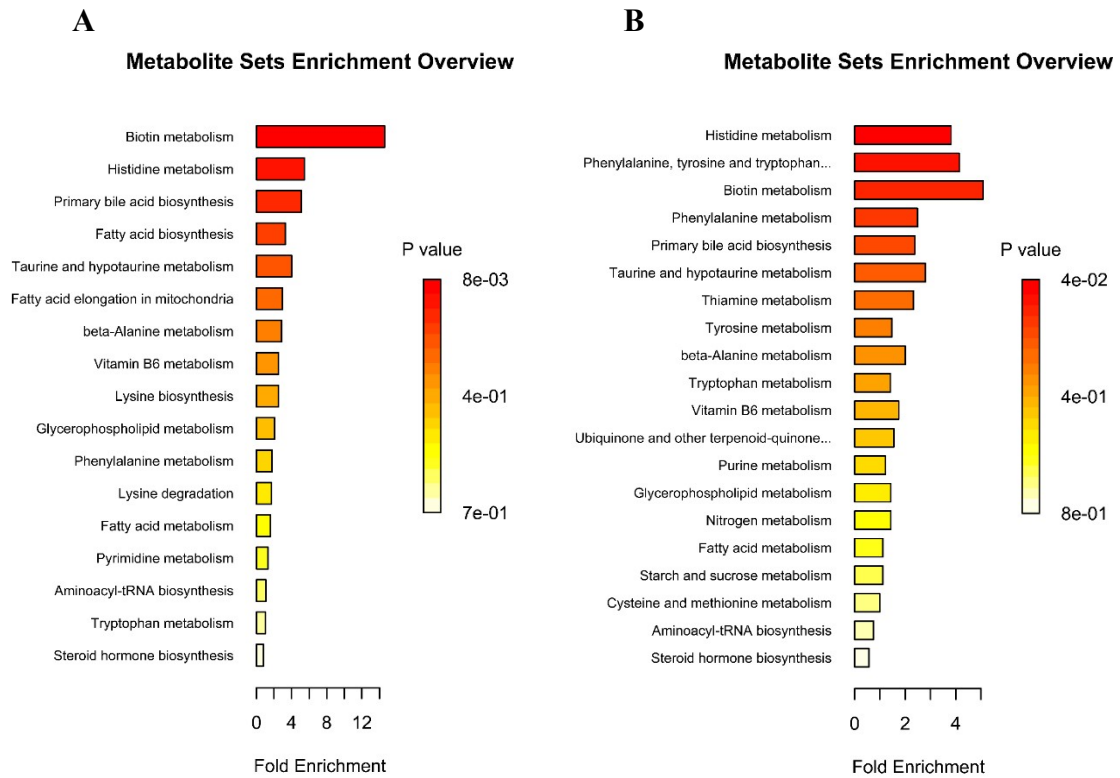

Fig.S7. (A) The top 17 of the enriched pathways are shown in the figure by using over-representation analysis (ORA) at 8 weeks; (B) The top 20 of the enriched pathways are shown in the figure by using over-representation analysis (ORA) at 16 weeks.

**Table S1. Baseline Characteristics by Study Group**

| Variable                                              | Investigational<br>(n=150) | Control<br>(n=150) | Breastfed<br>(n=150) | Group Difference<br>p-value |
|-------------------------------------------------------|----------------------------|--------------------|----------------------|-----------------------------|
| <b><i>Birth History:</i></b>                          |                            |                    |                      |                             |
| Weight at birth, g                                    | 3308.3±370.6               | 3325.3±341.5       | 3277.5±345.0         | 0.494                       |
| Length at birth, mm                                   | 499.1±6.8                  | 498.6±7.2          | 498.7±5.5            | 0.817                       |
| <b><i>Demographics:</i></b>                           |                            |                    |                      |                             |
| Infant male sex, %                                    | 75 (50.0)                  | 75 (50.0)          | 75 (50.0)            | NA                          |
| Infant gestational age, day                           | 39.3±1.0                   | 39.3±0.9           | 39.3±0.9             | 0.655                       |
| Mother's age, year                                    | 29.2±4.6                   | 29.0±4.0           | 28.5±4.0             | 0.349                       |
| Mother's marital status, %                            |                            |                    |                      |                             |
| Single                                                | 1 (0.7)                    | 4 (2.7)            | 1 (0.7)              | 0.378                       |
| Married                                               | 149 (99.3)                 | 146 (97.3)         | 149 (99.3)           |                             |
| Mother's smoking status during pregnancy, %           | 0 (0.0)                    | 0 (0.0)            | 0 (0.0)              | NA                          |
| Mother's alcohol intakes during pregnancy, %          | 0 (0.0)                    | 0 (0.0)            | 0 (0.0)              | NA                          |
| Number of previous live births to the infant's mother | 0 (0-3)                    | 0 (0-2)            | 0 (0-2)              | 0.707                       |
| 0                                                     | 76 (50.7)                  | 80 (53.3)          | 78 (52.0)            |                             |
| 1                                                     | 71 (47.3)                  | 69 (46.0)          | 60 (40.0)            |                             |
| 2                                                     | 2 (1.3)                    | 1 (0.7)            | 12 (8.0)             |                             |
| 3                                                     | 1 (0.7)                    | 0 (0.0)            | 0 (0.0)              |                             |
| Infant insurance, %                                   | 150 (100.0)                | 150 (100.0)        | 150 (100.0)          | NA                          |
| <b><i>Anthropometrics at baseline:</i></b>            |                            |                    |                      |                             |
| Infant age, days                                      | 13.3±1.0                   | 13.3±1.0           | 13.1±1.2             | 0.361                       |
| Weight, g                                             | 3758.2±417.4               | 3746.4±380.9       | 3682.6±342.7         | 0.183                       |
| Length, mm                                            | 521.9±10.6                 | 520.7±10.8         | 519.8±10.0           | 0.174                       |
| Head circumference, mm                                | 354.4±8.9                  | 355.3±8.1          | 353.4±7.9            | 0.121                       |
| Weight-for-age z-score                                | 0.21±0.75                  | 0.19±0.67          | 0.09±0.68            | 0.258                       |
| Length-for-age z-score                                | 0.21±0.57                  | 0.14±0.52          | 0.10±0.56            | 0.250                       |
| Weight-for-length z-score                             | -0.27±0.86                 | -0.21±0.84         | -0.33±0.86           | 0.476                       |
| Head circumference-for-age z-score                    | -0.03±0.80                 | 0.05±0.68          | -0.10±0.69           | 0.169                       |
| <b><i>Socioeconomic status:</i></b>                   |                            |                    |                      |                             |
| Number of family members                              | 3 (2-6)                    | 3 (2-6)            | 3 (2-7)              | 0.095                       |
| Household size, %                                     |                            |                    |                      | 0.303                       |
| <60 m <sup>2</sup>                                    | 19 (12.7)                  | 21 (14.0)          | 26 (17.3)            |                             |
| 60-90 m <sup>2</sup>                                  | 48 (32.0)                  | 50 (33.3)          | 57 (38.0)            |                             |
| 90-120 m <sup>2</sup>                                 | 66 (44.0)                  | 60 (40.0)          | 59 (39.3)            |                             |
| >120 m <sup>2</sup>                                   | 17 (11.3)                  | 19 (12.7)          | 8 (5.3)              |                             |
| Mother's educational level, %                         |                            |                    |                      | 0.203                       |
| Primary school                                        | 3 (2.0)                    | 4 (2.7)            | 10 (6.7)             |                             |
| Junior school                                         | 39 (26.0)                  | 41 (27.3)          | 46 (30.7)            |                             |
| High school/ Technology school                        | 95 (63.3)                  | 94 (62.7)          | 89 (59.3)            |                             |
| Bachelor                                              | 12 (8.0)                   | 11 (7.3)           | 5 (3.3)              |                             |

|                                |            |             |            |       |
|--------------------------------|------------|-------------|------------|-------|
| Master and above               | 1 (0.7)    | 0 (0.0)     | 0 (0.0)    |       |
| Father's educational level, %  |            |             |            | 0.079 |
| Primary school                 | 2 (1.3)    | 0 (0.0)     | 4 (2.7)    |       |
| Junior school                  | 39 (26.0)  | 43 (28.7)   | 44 (29.3)  |       |
| High school/ Technology school | 94 (62.7)  | 98 (65.3)   | 98 (65.3)  |       |
| Bachelor                       | 15 (10.0)  | 9 (6.0)     | 4 (2.7)    |       |
| Master and above               | 0 (0.0)    | 0 (0.0)     | 0 (0.0)    |       |
| Mother currently employed, %   | 81 (54.0)  | 73 (48.7)   | 63 (42.0)  | 0.114 |
| Father currently employed, %   | 149 (99.3) | 150 (100.0) | 148 (98.7) | 0.776 |

Data presented are mean  $\pm$  standard deviation for continuous variables and frequency (%) for categorical variables. Group difference was evaluated using one-way ANOVA for continuous variables and chi-square/Fisher's exact test for categorical variables.

**Table S2. The differential metabolites of three groups at 8 weeks**

| Differential metabolites   | VIP         | $-\log_{10}(p)$ |
|----------------------------|-------------|-----------------|
| N,N-Diphenylguanidine      | 1.836358292 | 13.06505        |
| 4-Pyridoxic acid           | 2.073043887 | 10.87769        |
| 18-beta-Glycyrrhetic acid  | 1.169071328 | 9.547585        |
| Corticosterone             | 2.400458032 | 8.682961        |
| Propylparaben              | 2.284840684 | 8.514932        |
| Dodecyltrimethylammonium   | 2.364755085 | 8.091692        |
| Acetyl-beta-methylcholine  | 2.122043356 | 7.588801        |
| Ethyl paraben              | 1.640881928 | 7.434778        |
| Prostaglandin K2           | 1.700598765 | 7.414517        |
| Oleoyl ethanolamide        | 1.782186534 | 5.165687        |
| Carnosine                  | 2.057929639 | 4.907069        |
| Senkyunolide H             | 1.99376272  | 4.594961        |
| 1-Methylhistidine          | 2.141056401 | 4.468764        |
| Monobutyl phthalate        | 1.708659865 | 3.833836        |
| Isophorone                 | 1.491348949 | 3.789441        |
| Tetrahydrocortisone        | 2.002909784 | 3.41679         |
| Diethyl phosphate          | 1.395174597 | 3.297328        |
| Glycochenodeoxycholic Acid | 1.924712427 | 3.265865        |
| Pulegone                   | 1.529418699 | 3.210292        |
| Adrenic acid               | 1.022865672 | 3.037484        |
| Taurocholic acid           | 1.926436567 | 2.770882        |
| 2,4-Quinolinediol          | 1.552118347 | 2.770882        |
| N-Acetylhistamine          | 1.015502659 | 2.698427        |
| Kynurenic acid             | 1.291145004 | 2.662521        |
| DL-Arginine                | 1.546215797 | 2.560115        |
| 2,4-Xylidine               | 1.286099008 | 2.560115        |
| Valpromide                 | 1.249759476 | 2.417596        |



|                             |             |          |
|-----------------------------|-------------|----------|
| 2,4-di-tert-Butylphenol     | 1.305969641 | 2.313873 |
| 1,5-Isoquinoline diol       | 1.383267061 | 2.261497 |
| C-8 Ceramide-1-phosphate    | 1.339164282 | 2.261497 |
| Triethyl phosphate          | 1.268245577 | 2.261497 |
| 2-(Methylthio)benzothiazole | 1.105032791 | 2.212008 |
| Phenylacetic acid           | 1.469764495 | 2.115851 |
| Taurochenodeoxycholic Acid  | 1.642154441 | 2.019329 |
| 4-Phenolsulfonic acid       | 1.504756438 | 1.8882   |
| Taurodeoxycholic Acid       | 1.584375816 | 1.680249 |
| DL-Carnitine                | 1.12103632  | 1.671682 |
| Valerolactam                | 1.428591975 | 1.549428 |
| Nicotinuric acid            | 1.571222579 | 1.50941  |
| 12-oxo Phytodienoic Acid    | 1.147298788 | 1.477673 |
| L-Lysine                    | 1.18950412  | 1.377589 |
| Biotin                      | 1.213578476 | 1.376823 |
| 3-Indoxyl sulphate          | 1.269212498 | 1.347773 |

**Table S3. The differential metabolites of three groups at 16 weeks**

| Differential metabolites  | VIP         | -log <sub>10</sub> (p) |
|---------------------------|-------------|------------------------|
| Ethyl paraben             | 2.50338062  | 12.5391                |
| Corticosterone            | 2.249073696 | 9.302771               |
| 4-Pyridoxic acid          | 1.932754207 | 8.357535               |
| Isophorone                | 2.16447135  | 7.058986               |
| N,N-Diphenylguanidine     | 1.665398929 | 6.821023               |
| Propylparaben             | 1.984599204 | 6.417937               |
| Diethyl phosphate         | 2.09408764  | 6.289037               |
| Valpromide                | 2.068422118 | 6.184422               |
| Triethyl phosphate        | 2.034957044 | 6.184422               |
| Monobutyl phthalate       | 1.884839336 | 6.184422               |
| 12-Hydroxydodecanoic acid | 1.389977726 | 6.184422               |
| Decanamide                | 1.952674992 | 5.480172               |
| Carnosine                 | 1.91794478  | 5.452225               |
| Acetyl-beta-methylcholine | 1.872901202 | 5.452225               |
| C-8 Ceramide-1-phosphate  | 1.573021268 | 4.692504               |
| Valerolactam              | 1.612952661 | 4.621602               |
| Oleoyl ethanolamide       | 1.520246488 | 4.447332               |
| 2,4-Quinolinediol         | 1.847375514 | 4.432974               |
| 1-Methylhistidine         | 1.702556474 | 4.195861               |
| Tetrahydrocortisone       | 1.663548504 | 4.053057               |
| Dodecyltrimethylammonium  | 1.579490881 | 4.053057               |
| Erucamide                 | 1.28110365  | 3.90389                |
| Sphingosine_d18_1_        | 1.637361382 | 3.802968               |

|                                         |             |          |
|-----------------------------------------|-------------|----------|
| DEET                                    | 1.637150687 | 3.802968 |
| 12-Aminododecanoic acid                 | 1.514601772 | 3.802968 |
| 1-Palmitoylglycerol                     | 1.471418293 | 3.802968 |
| 4-Hydroxybenzaldehyde                   | 1.442423517 | 3.639956 |
| N-Acetylneuraminic acid                 | 1.415842823 | 3.635055 |
| N-Acetylhistamine                       | 1.028969515 | 3.635055 |
| Docosahexaenoic acid ethyl ester        | 1.290940854 | 3.003138 |
| Pulegone                                | 1.216195025 | 2.981757 |
| 2,4-Xylidine                            | 1.311590884 | 2.940702 |
| 1-Methylxanthine                        | 1.174684801 | 2.844482 |
| 2-(Methylthio)benzothiazole             | 1.490703943 | 2.755031 |
| 1-Linoleoyl glycerol                    | 1.096346078 | 2.66615  |
| 1-Tetradecylamine                       | 1.42093395  | 2.468176 |
| DL-Arginine                             | 1.38319731  | 2.443143 |
| N8-Acetylspermidine                     | 1.143663368 | 2.441052 |
| 12-oxo Phytodienoic Acid                | 1.433633763 | 2.375677 |
| Tyrosol                                 | 1.03118906  | 2.364165 |
| 4-Hydroxyphenylpyruvic acid             | 1.282142817 | 2.234026 |
| N,N-dimethyl-9H-purin-6-amine           | 1.372143058 | 2.186786 |
| Testosterone enanthate                  | 1.02019852  | 2.186786 |
| Senkyunolide H                          | 1.248506725 | 2.117231 |
| 2-Hydroxyvaleric acid                   | 1.244841192 | 2.116736 |
| Prostaglandin K2                        | 1.319770216 | 2.077991 |
| Kynurenic acid                          | 1.257829486 | 2.04761  |
| Decanoylcarnitine                       | 1.037321097 | 1.996453 |
| Aspartylphenylalanine                   | 1.23066507  | 1.889579 |
| 1,5-Isoquinoline diol                   | 1.229941927 | 1.814373 |
| Myristic acid alkyne                    | 1.015838168 | 1.758006 |
| 11-Deoxy prostaglandin F1               | 1.241984316 | 1.73781  |
| Tridecyclic acid                        | 1.095490374 | 1.582628 |
| Indole-3-acrylic acid                   | 1.006026767 | 1.531239 |
| Dodecyl sulfate                         | 1.024037321 | 1.520468 |
| Acetanilide                             | 1.041120733 | 1.49853  |
| Acetylcholine                           | 1.084232004 | 1.463303 |
| 12-dihydroxyheptadec-16-yn-4-yl acetate | 1.006286011 | 1.43903  |
| 2-Aminooctanedioic acid                 | 1.011714436 | 1.405386 |
| 2,4-di-tert-Butylphenol                 | 1.124799801 | 1.347976 |
| Biopterin                               | 1.080451219 | 1.347976 |

**Table S4. The differential metabolites between the investigational and the control groups at 8 weeks**

| Differential metabolites | log <sub>2</sub> (FC) | -log <sub>10</sub> (p) |
|--------------------------|-----------------------|------------------------|
| N,N-Diphenylguanidine    | 1.1033                | 2.34106373             |

|                             |         |             |
|-----------------------------|---------|-------------|
| Acetylcholine               | 1.0395  | 2.672273348 |
| Palmitic Acid               | -1.0409 | 2.119443632 |
| Taurocholic acid            | -1.1729 | 2.160069667 |
| 2-(Methylthio)benzothiazole | -1.21   | 2.169905566 |
| 18-beta-Glycyrrhetic acid   | -1.2626 | 4.246838419 |
| Glycochenodeoxycholic Acid  | -1.4995 | 2.291953213 |
| Erucamide                   | -2.1067 | 3.296424918 |
| Propylparaben               | -2.8018 | 2.617154804 |
| Taurochenodeoxycholic Acid  | -2.9165 | 2.165255127 |
| Stearoyl Ethanolamide       | -4.2756 | 3.693832408 |

**Table S5. The differential metabolites between the investigational and the control groups at 16 weeks**

| Differential metabolites    | log <sub>2</sub> (FC) | -log <sub>10</sub> (p) |
|-----------------------------|-----------------------|------------------------|
| Monoolein                   | 3.0693                | 1.371365891            |
| 2,4-Quinolinediol           | 2.0916                | 2.527228928            |
| N-Acetylhistamine           | 2.0424                | 4.279361169            |
| Corticosterone              | 1.2634                | 1.496222931            |
| 2-Aminooctanedioic acid     | 1.0802                | 1.727601368            |
| Panthenol                   | -1.1598               | 1.33048787             |
| 4-Hydroxybenzaldehyde       | -1.2181               | 3.340692429            |
| 4-Hydroxyphenylpyruvic acid | -1.2729               | 1.581765018            |
| N-Acetyl sphingosine        | -1.685                | 1.371703048            |
| Taurocholic acid            | -2.3172               | 1.788078916            |
| Glycochenodeoxycholic Acid  | -3.4309               | 2.670764884            |
| Taurodeoxycholic Acid       | -3.4967               | 1.879360272            |
